# Supplementary material for: A systematic review and meta‐analysis of the effectiveness of meal replacements for weight loss
Source: PubMed Central journal article supplement (PMC6849863; doi:10.1111/obr.12816), 2019-01-24
Supplement: OBR-20-569-s001.pdf [file OBR-20-569-s001.pdf]

## Supplementary Table 1: Medline search strategy

|                                                                                                                                                                                                                         |           |
|-------------------------------------------------------------------------------------------------------------------------------------------------------------------------------------------------------------------------|-----------|
| <b>Supplementary Table 1:</b> Example of search strategy (MEDLINE)                                                                                                                                                      | <b>2</b>  |
| <b>Supplementary Table 2:</b> Descriptions of the intervention and control groups in each of the comparisons                                                                                                            | <b>3</b>  |
| <b>Supplementary Table 3:</b> Justification of studies judged at high or unclear risk of bias in one or more domain                                                                                                     | <b>4</b>  |
| <b>Supplementary Figure 1:</b> Forest plot of mean change in fasting blood glucose concentrations (mmol/L) from baseline to 1 year between interventions incorporating meal replacements (MR) and control interventions | <b>5</b>  |
| <b>Supplementary Figure 2:</b> Forest plot of mean change in fasting serum insulin concentrations (pmol/L) from baseline to 1 year between interventions incorporating meal replacements (MR) and control interventions | <b>6</b>  |
| <b>Supplementary Figure 3:</b> Forest plot of mean change in HbA1c (%) from baseline to 1 year between interventions incorporating meal replacements (MR) and control interventions                                     | <b>7</b>  |
| <b>Supplementary Figure 4:</b> Forest plot of mean change in total cholesterol concentrations (mmol/L) from baseline to 1 year between interventions incorporating meal replacements (MR) and control interventions     | <b>8</b>  |
| <b>Supplementary Figure 5:</b> Forest plot of mean change in LDL cholesterol concentrations (mmol/L) to 1 year between interventions incorporating meal replacements (MR) and control interventions                     | <b>9</b>  |
| <b>Supplementary Figure 6:</b> Forest plot of mean change in HDL cholesterol concentrations (mmol/L) from baseline to 1 year between interventions incorporating meal replacements (MR) and control interventions       | <b>10</b> |
| <b>Supplementary Figure 7:</b> Forest plot of mean change in triglyceride concentrations (mmol/L) from baseline to 1 year between interventions incorporating meal replacements (MR) and control interventions          | <b>11</b> |

**Supplementary Table 1: Medline search strategy**

**Supplementary Figure 8:** Forest plot of mean change in systolic blood pressure (mmHg) from baseline to 1 year between interventions incorporating meal replacements (MR) and control interventions **12**

**Supplementary Figure 9:** Forest plot of mean change in diastolic blood pressure (mmHg) from baseline to 1 year between interventions incorporating meal replacements (MR) and control interventions **13**

## Supplementary Table 1: Medline search strategy

| #  | Searches                                                                                                                   |
|----|----------------------------------------------------------------------------------------------------------------------------|
| ▲  |                                                                                                                            |
| 1  | overweight/ or exp obesity/                                                                                                |
| 2  | (obes* or overweight).ti,ab.                                                                                               |
| 3  | 1 or 2                                                                                                                     |
| 4  | (meal? adj2 replace*).ti,ab.                                                                                               |
| 5  | ((preprepared or pre-prepared or prepared) adj2 (meal? or food? or snack? or portion?)).ti,ab.                             |
| 6  | ((prepack* or pre-pack*) adj2 (meal? or food? or snack? or portion?)).ti,ab.                                               |
| 7  | (eating plan? or meal plan* or planned meal? or planned menu?).ti,ab.                                                      |
| 8  | (portion controlled adj2 (diet? or meal? or food? or weight loss)).ti,ab.                                                  |
| 9  | (liquid adj2 (diet? or meal? or food?)).ti,ab.                                                                             |
| 10 | (replace* adj (snack? or drink? or food? or liquid?)).ti,ab.                                                               |
| 11 | shake?.ti,ab.                                                                                                              |
| 12 | (commercial* adj2 (program* or intervention? or weight loss or diet?)).ti,ab.                                              |
| 13 | (isoenergetic adj (diet? or food? or meal?)).ti,ab.                                                                        |
| 14 | (jenny craig or diet chef or nutrisystem or slimfast or slim fast or medifast or optifast or hmr).ti,ab,in.                |
| 15 | 4 or 5 or 6 or 7 or 8 or 9 or 10 or 11 or 12 or 13 or 14                                                                   |
| 16 | Weight Loss/                                                                                                               |
| 17 | (weight adj3 (loss or lose or lost or losing or chang* or reduc* or maintain* or maintenance)).ti,ab.                      |
| 18 | body mass index/ or waist-hip ratio/ or Waist Circumference/                                                               |
| 19 | (bmi or body mass or waist-hip or waist circumference).ti,ab.                                                              |
| 20 | 16 or 17 or 18 or 19                                                                                                       |
| 21 | 3 and 15 and 20                                                                                                            |
| 22 | Weight Reduction Programs/                                                                                                 |
| 23 | caloric restriction/ or diet, carbohydrate-restricted/ or diet, fat-restricted/ or diet, mediterranean/ or diet, reducing/ |
| 24 | 22 or 23                                                                                                                   |
| 25 | 15 and 24                                                                                                                  |
| 26 | 21 or 25                                                                                                                   |
| 27 | limit 26 to "reviews (maximizes specificity)"                                                                              |
| 28 | randomized controlled trial.pt.                                                                                            |
| 29 | controlled clinical trial.pt.                                                                                              |
| 30 | randomized.ab.                                                                                                             |
| 31 | placebo.ab.                                                                                                                |
| 32 | drug therapy.fs.                                                                                                           |
| 33 | randomly.ab.                                                                                                               |
| 34 | trial.ab.                                                                                                                  |
| 35 | groups.ab.                                                                                                                 |
| 36 | 28 or 29 or 30 or 31 or 32 or 33 or 34 or 35                                                                               |
| 37 | exp animals/ not humans.sh.                                                                                                |
| 38 | 36 not 37                                                                                                                  |
| 39 | 26 and 38                                                                                                                  |
| 40 | 27 or 39                                                                                                                   |

**Supplementary Table 2:** Descriptions of the intervention and control groups in each of the comparisons

| <b>Intervention arms</b>   | Description                                                                                                                                                                                                                     | Example                                                                                                                                                                                                                                                                                                                                                                                                                         |
|----------------------------|---------------------------------------------------------------------------------------------------------------------------------------------------------------------------------------------------------------------------------|---------------------------------------------------------------------------------------------------------------------------------------------------------------------------------------------------------------------------------------------------------------------------------------------------------------------------------------------------------------------------------------------------------------------------------|
| MR diet                    | Guidance and/or provision of meal replacements to replace one or more daily meals or snacks. No additional provision of behavioural support programme.                                                                          | Participants followed a self-selected diet, except that two of the three main meals (breakfast, lunch, dinner) were replaced with a liquid meal replacement [23].                                                                                                                                                                                                                                                               |
| MR diet + support          | Programme of support provided (of similar intensity as the support provided in the control arm). This programme included guidance and/or provision of MR to replace one or more meals or snacks as per study specific protocol. | Participants were advised to follow a hypoenergetic diet consisting of 5 meal replacements and a self-select healthy meal. They also met with a dietitian bi-weekly during for 16-weeks then twice during the 24 week weight maintenance phase for dietary and behavioural counselling [39].                                                                                                                                    |
| MR diet + enhanced support | Guidance and/or provision of meal replacements alongside a programme of support based on behaviour change concepts which is of greater intensity to the support programme provided in the control arm.                          | Participants were advised to follow an individualised hypoenergetic diet that includes pre-packaged prepared food items that are accompanied by self-selected vegetables, fruit. Weekly interactions include strategies for making appropriate food choices and cognitive aspects of promoting weight loss and maintenance. In addition there was a goal of 30 minutes of physical activity on 5 or more days of the week [36]. |
| <b>Control arms</b>        |                                                                                                                                                                                                                                 |                                                                                                                                                                                                                                                                                                                                                                                                                                 |
| Diet + support             | Advice and guidance provided on weight loss                                                                                                                                                                                     |                                                                                                                                                                                                                                                                                                                                                                                                                                 |
| Diet only                  | Intervention that specifies that only advice on dietary change, with no support to implement the dietary change was provided to participants.                                                                                   | Meal plan provided during initial contact with dietitian, but no further contact                                                                                                                                                                                                                                                                                                                                                |
| Minimal intervention       | Minimal advice given                                                                                                                                                                                                            | One-off contact, advice session written material                                                                                                                                                                                                                                                                                                                                                                                |

**Supplementary Table 3:** Justification of studies judged at high or unclear risk of bias in one or more domain

|                                                     | Comment on judgement                                                                                                                                                                                      |
|-----------------------------------------------------|-----------------------------------------------------------------------------------------------------------------------------------------------------------------------------------------------------------|
| <b>MR diet vs. diet-only</b>                        |                                                                                                                                                                                                           |
| Ahrens 2003                                         | Insufficient information on how randomisation sequence was generated.<br>Insufficient information to determine if adequate allocation concealment was employed.<br>Incomplete outcome data ; >50% missing |
| Cheskin 2008                                        | Insufficient information to determine if adequate allocation concealment was employed.<br>Unbalanced missing outcome data between groups                                                                  |
| Ditschuneit 2001                                    | Insufficient information to determine if adequate allocation concealment was employed.                                                                                                                    |
| Khoo 2011                                           | Insufficient information on how randomisation sequence was generated.<br>Insufficient information to determine if adequate allocation concealment was employed.                                           |
| Rothacker 2001                                      | Insufficient information on how randomisation sequence was generated.<br>Insufficient information to determine if adequate allocation concealment was employed.                                           |
| <b>MR diet + support vs. diet + support</b>         |                                                                                                                                                                                                           |
| Ashley 2001                                         | Insufficient information on how randomisation sequence was generated.<br>Insufficient information to determine if adequate allocation concealment was employed.                                           |
| Ashley 2007                                         | Insufficient information on how randomisation sequence was generated.<br>Insufficient information to determine if adequate allocation concealment was employed.                                           |
| Chee 2018                                           | Insufficient information to determine if adequate allocation concealment was employed.                                                                                                                    |
| Davis 2010                                          | Incomplete outcome data; >50% missing                                                                                                                                                                     |
| Flechtner-Mors 2010                                 | Unbalanced missing outcome data between groups                                                                                                                                                            |
| Li 2005                                             | Unbalanced missing outcome data between groups                                                                                                                                                            |
| Lowe 2018                                           | Insufficient information on how randomisation sequence was generated.<br>Insufficient information to determine if adequate allocation concealment was employed.                                           |
| Rolls 2017                                          | Insufficient information to determine if adequate allocation concealment was employed.                                                                                                                    |
| <b>MR diet + support vs. diet only</b>              |                                                                                                                                                                                                           |
| Rock 2007                                           | Insufficient information on how randomisation sequence was generated.<br>Insufficient information to determine if adequate allocation concealment was employed.                                           |
| <b>MR diet + enhanced support vs diet + support</b> |                                                                                                                                                                                                           |
| Rock 2010                                           | Insufficient information on how randomisation sequence was generated.<br>Insufficient information to determine if adequate allocation concealment was employed.                                           |
| Rock 2014                                           | Insufficient information to determine if adequate allocation concealment was employed.                                                                                                                    |
| <b>MR diet + support vs. minimal control</b>        |                                                                                                                                                                                                           |
| Xu 2013                                             | Insufficient information on how randomisation sequence was generated.<br>Insufficient information to determine if adequate allocation concealment was employed.                                           |

**Supplementary Figure 1: Forest plot of mean change in fasting blood glucose concentrations (mmol/L) from baseline to 1 year between interventions incorporating meal replacements (MR) and control interventions**

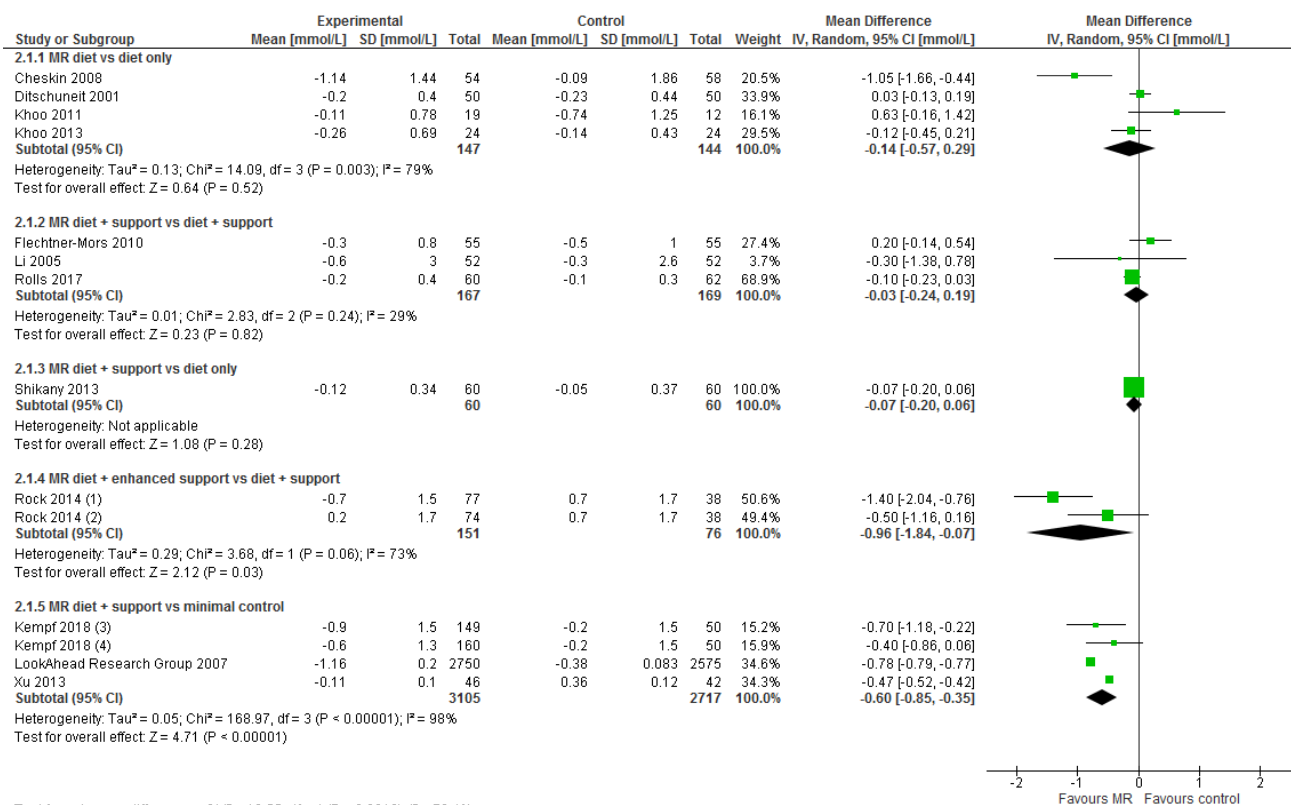

Test for subgroup differences: Chi<sup>2</sup> = 18.55, df = 4 (P = 0.0010), I<sup>2</sup> = 78.4%

**Footnotes**

- (1) low carbohydrate MR
- (2) low fat MR
- (3) Stringent use of MR
- (4) Moderate use of MR

**Supplementary Figure 2:** Forest plot of mean change in fasting serum insulin concentrations (pmol/L) from baseline to 1 year between interventions incorporating meal replacements (MR) and control interventions

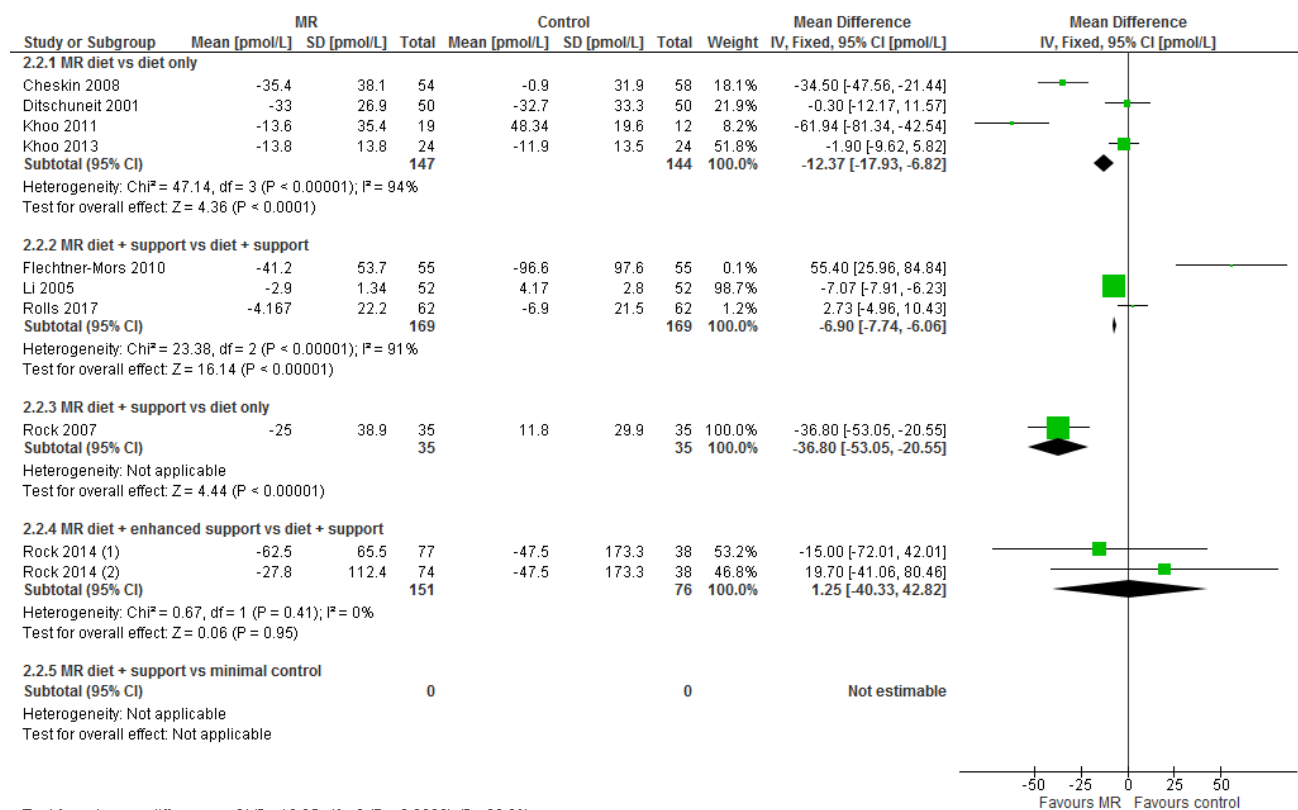

Test for subgroup differences: Chi<sup>2</sup> = 16.65, df = 3 (P = 0.0008), I<sup>2</sup> = 82.0%

**Footnotes**

- (1) Low Fat MR
- (2) Low CHO MR

**Supplementary Figure 3:** Forest plot of mean change in HbA1c (%) from baseline to 1 year between interventions incorporating meal replacements (MR) and control interventions

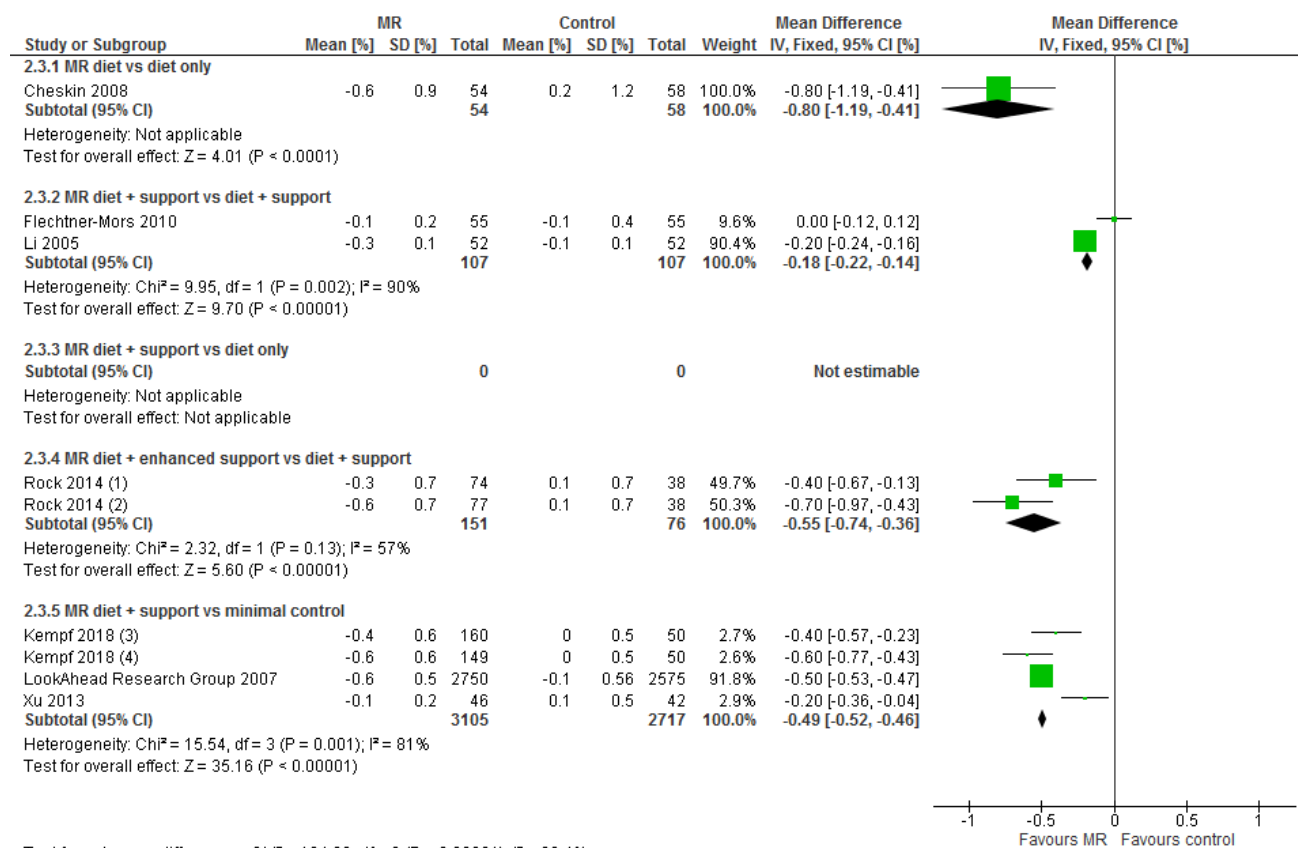

Test for subgroup differences: Chi<sup>2</sup> = 184.86, df = 3 (P < 0.00001), I<sup>2</sup> = 98.4%

**Footnotes**

- (1) low fat MR
- (2) low cho MR
- (3) Moderate use of MR
- (4) Stringent use of MR



**Supplementary Figure 4:** Forest plot of mean change in total cholesterol concentrations (mmol/L) from baseline to 1 year between interventions incorporating meal replacements (MR) and control interventions

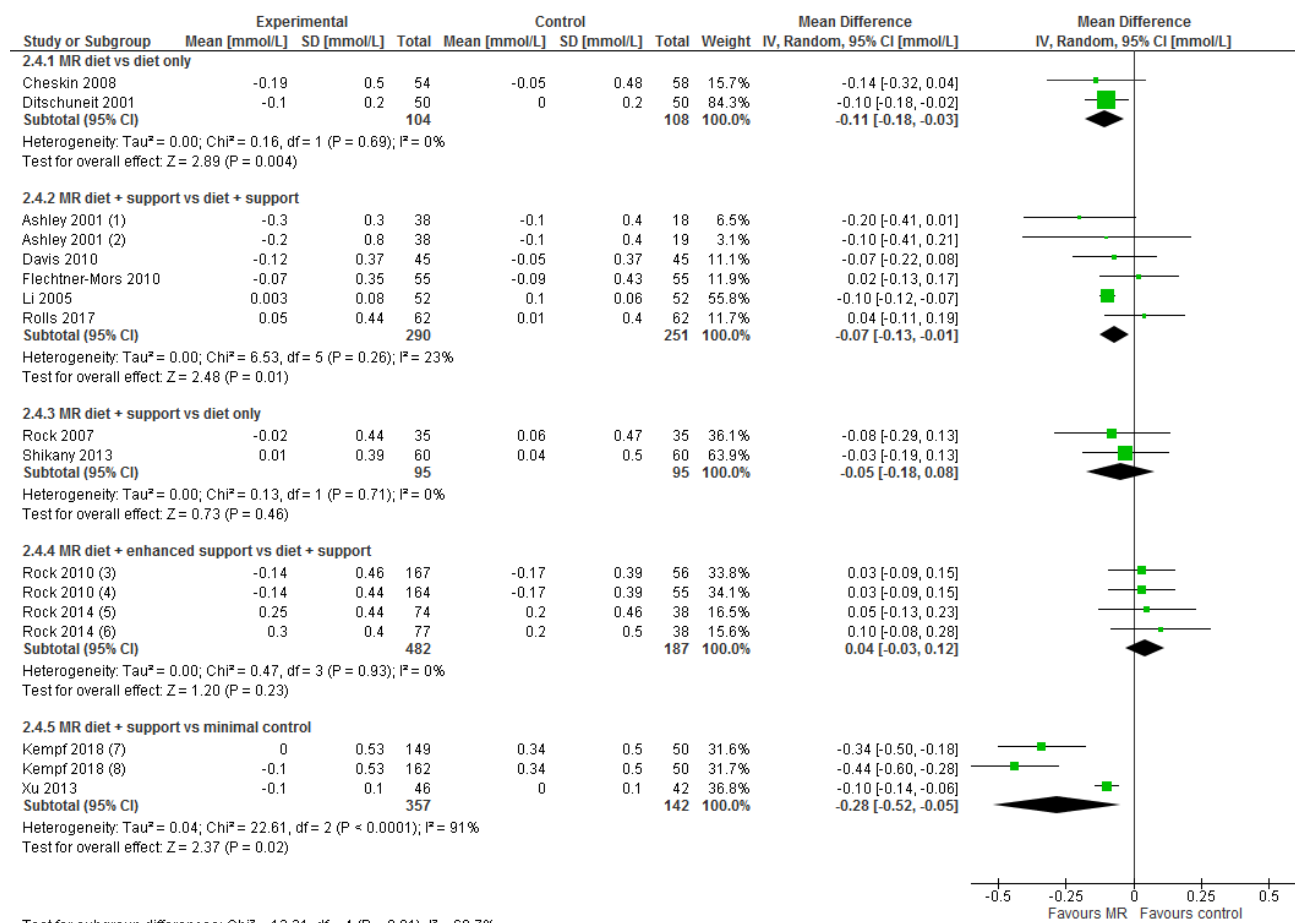

**Footnotes**

- (1) physician/nurse led intervention
- (2) dietician led intervention
- (3) in person support
- (4) telephone support
- (5) low fat MR
- (6) low carbohydrate MR
- (7) Stringent use MR
- (8) Moderate use MR

**Supplementary Figure 5: Forest plot of mean change in LDL cholesterol concentrations (mmol/L) to 1 year between interventions incorporating meal replacements (MR) and control interventions**

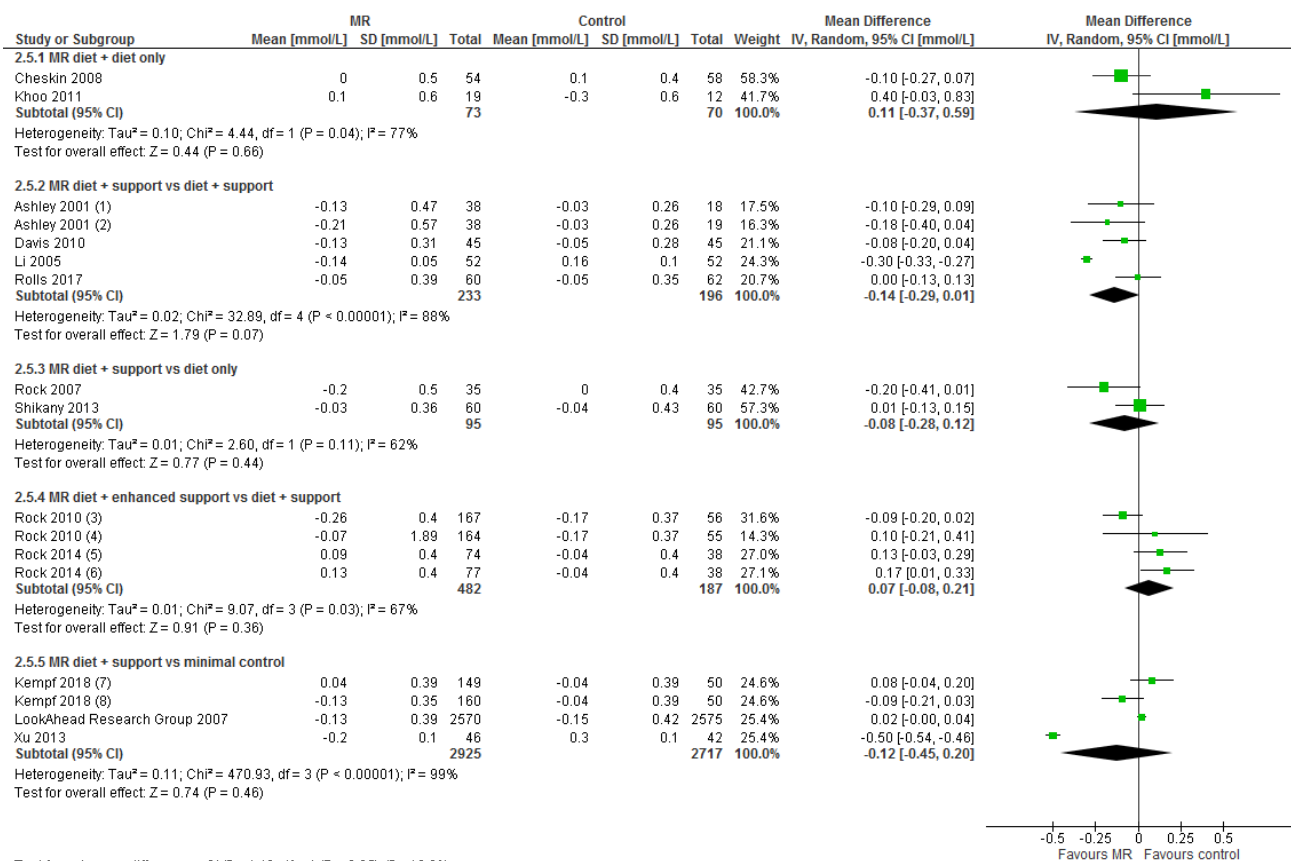

Test for subgroup differences: Chi<sup>2</sup> = 4.46, df = 4 (P = 0.35), I<sup>2</sup> = 10.3%

**Footnotes**

- (1) physician/nurse led intervention
- (2) dietician led intervention
- (3) in person support
- (4) telephone support
- (5) low fat MR
- (6) low carbohydrate MR
- (7) Stringent MR use
- (8) Moderate MR use

**Supplementary Figure 6:** Forest plot of mean change in HDL cholesterol concentrations (mmol/L) from baseline to 1 year between interventions incorporating meal replacements (MR) and control interventions

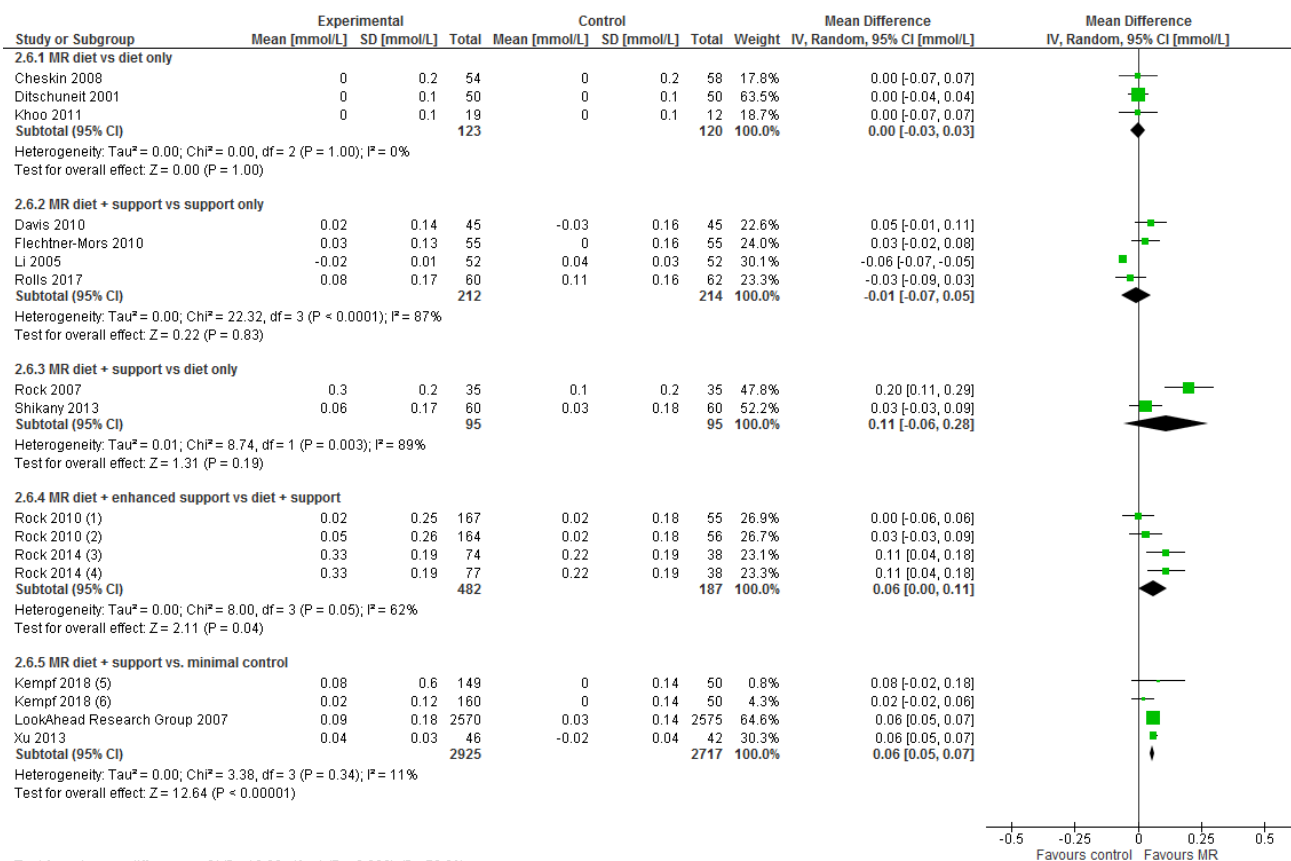

**Footnotes**

- (1) in person support
- (2) telephone support
- (3) low fat MR
- (4) low carbohydrate MR
- (5) Stringent MR use
- (6) Moderate MR use

**Supplementary Figure 7: Forest plot of mean change in triglyceride concentrations (mmol/L) from baseline to 1 year between interventions incorporating meal replacements (MR) and control interventions**

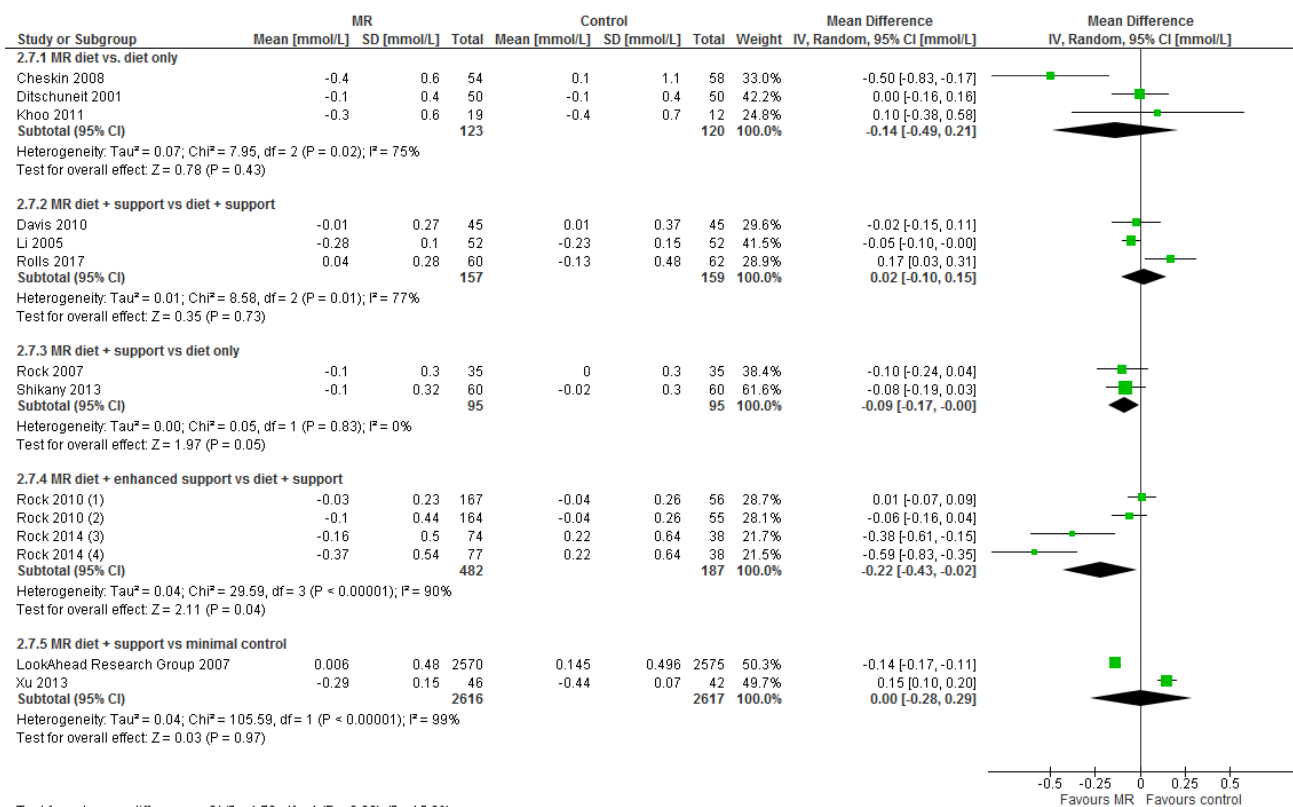

Test for subgroup differences: Chi<sup>2</sup> = 4.72, df = 4 (P = 0.32), I<sup>2</sup> = 15.3%

**Footnotes**

- (1) in person support
- (2) telephone support
- (3) low fat MR
- (4) low carbohydrate MR

**Supplementary Figure 8:** Forest plot of mean change in systolic blood pressure (mmHg) from baseline to 1 year between interventions incorporating meal replacements (MR) and control interventions

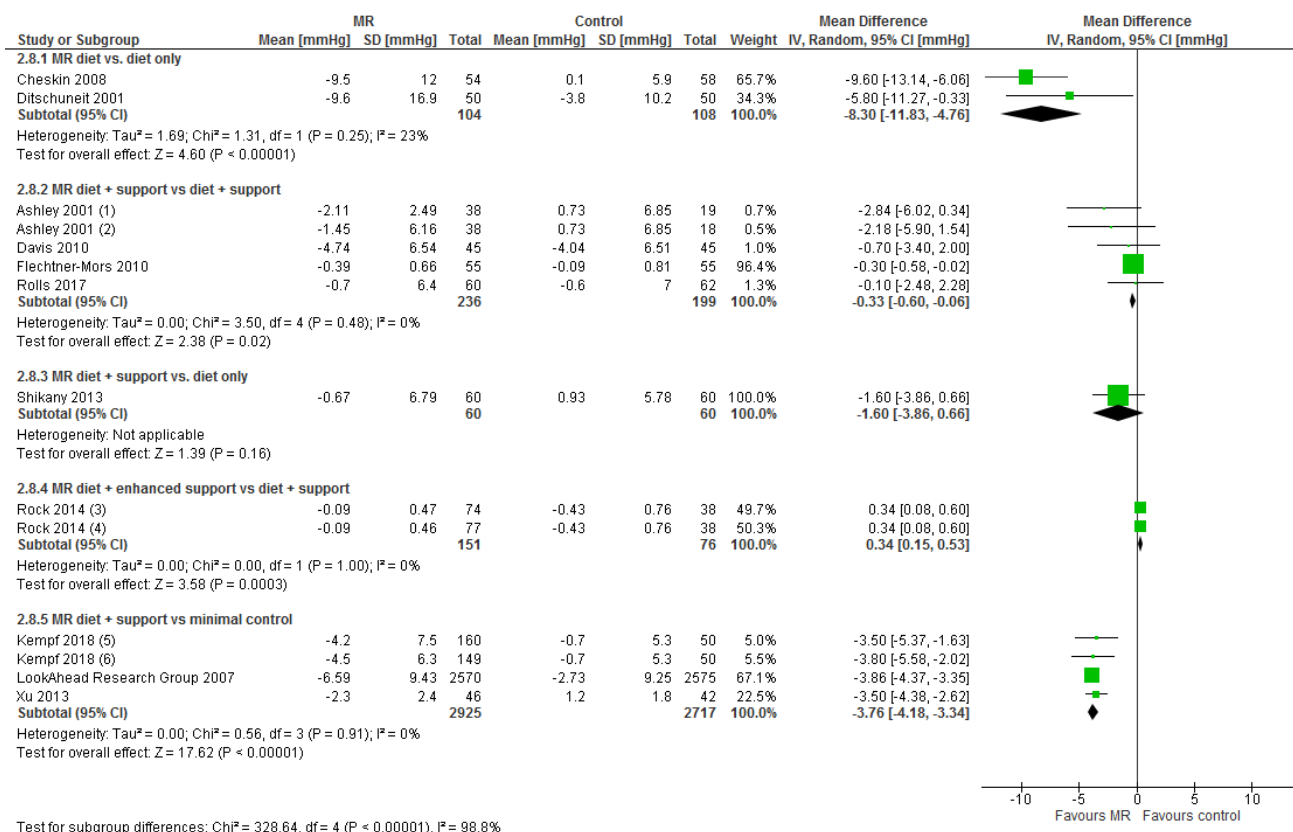

**Supplementary Figure 9: Forest plot of mean change in diastolic blood pressure (mmHg) from baseline to 1 year between interventions incorporating meal replacements (MR) and control interventions**

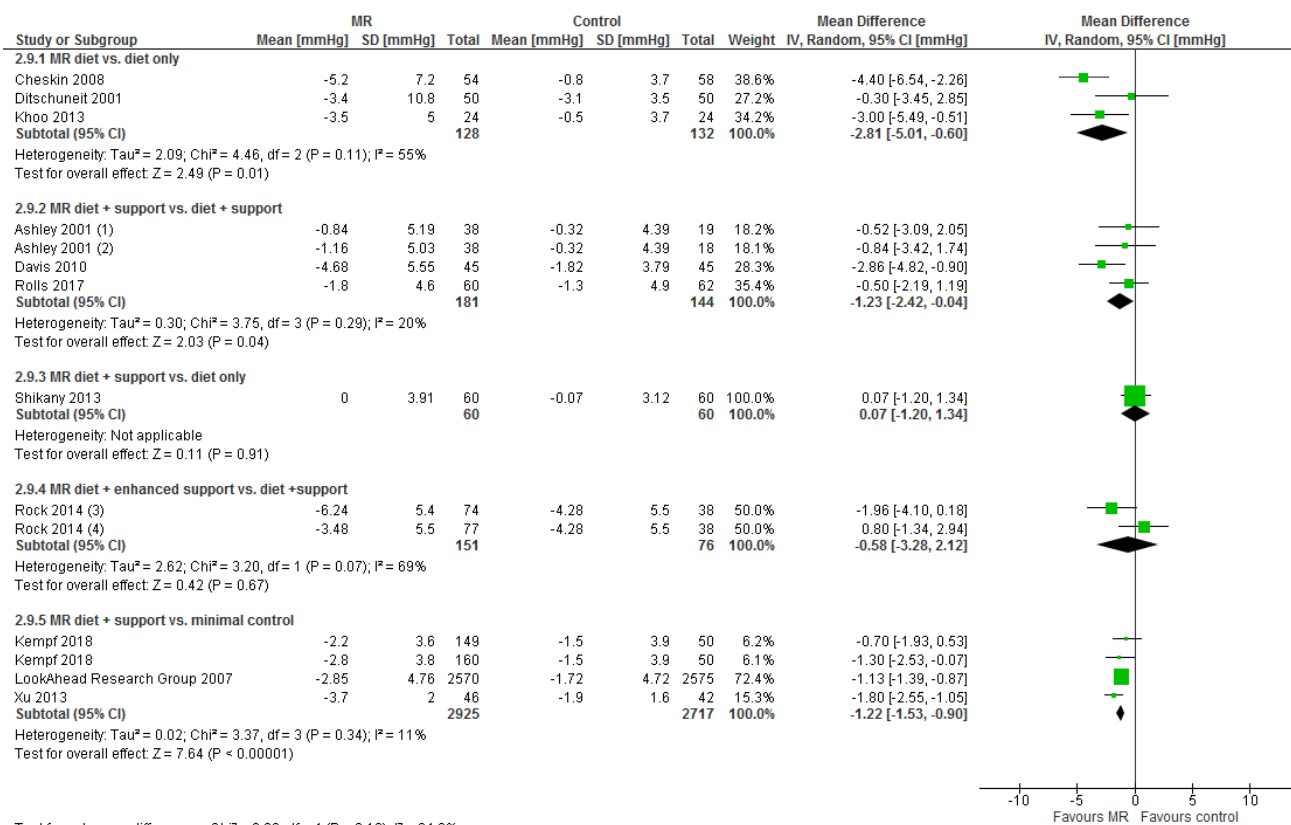

Test for subgroup differences: Chi<sup>2</sup> = 6.08, df = 4 (P = 0.19), I<sup>2</sup> = 34.2%

**Footnotes**

- (1) dietician led intervention
- (2) physician/nurse led intervention
- (3) low fat MR
- (4) low carbohydrate MR
